# Supplementary material for: Enhanced Thermal Stability, Mechanical Properties and Structural Integrity of MWCNT Filled Bamboo/Kenaf Hybrid Polymer Nanocomposites
Source: MDPI journal article supplement (doi:10.3390/ma15020506), 2022-01-10
Supplement: s1 [file s1]

# Enhanced Thermal Stability, Mechanical Properties and Structural Integrity of MWCNT Filled Bamboo/Kenaf Hybrid Polymer Nanocomposites

J.M.Prabhudass <sup>1,2</sup>, K.Palanikumar <sup>2,\*</sup>, Elango Natarajan <sup>3,\*</sup>, Kalaimani Markandan <sup>3</sup>

<sup>1</sup> Department of Mechanical Engineering, Sathyabama Institute of Science and Technology, 600001 Chennai, India; prabhu.mech@sairamit.edu.in

<sup>2</sup> Department of Mechanical Engineering, Sri Sai Ram Institute of Technology, 600001 Chennai, Tamil Nadu, India

<sup>3</sup> Faculty of Engineering, Technology and Built Environment, UCSI University, 56000, Kuala Lumpur, Malaysia; kalaimani@ucsiuniversity.edu.my

\* Correspondence: palanikumar@sairamit.edu.in (K.P.); elango@ucsiuniversity.edu.my (E.N.)

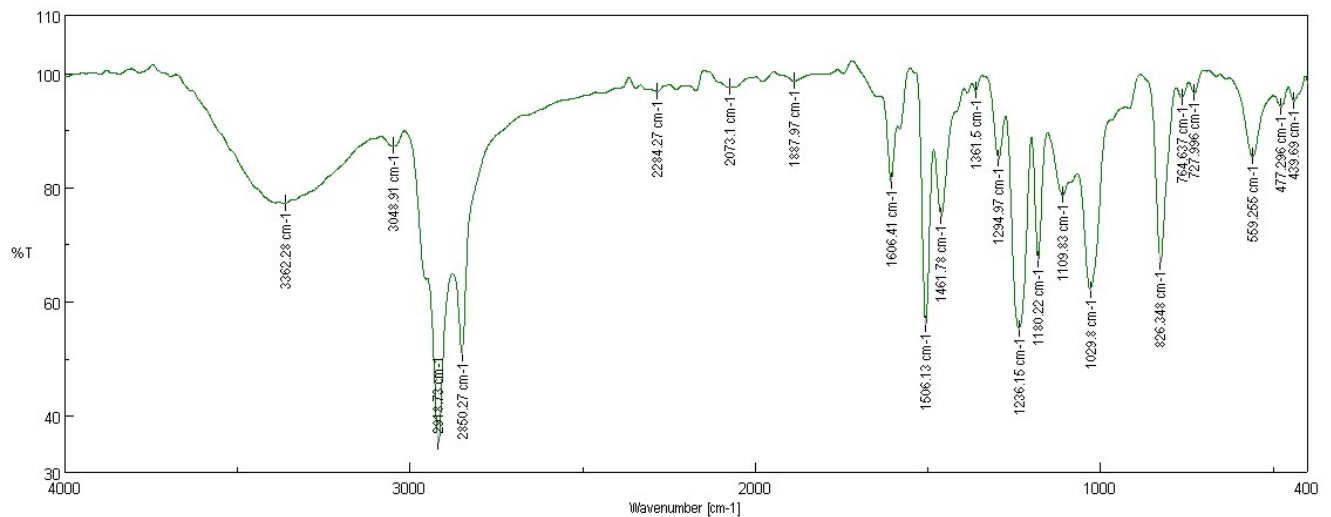

Figure S1: FTIR Analysis of Laminate 1: Bamboo + Epoxy

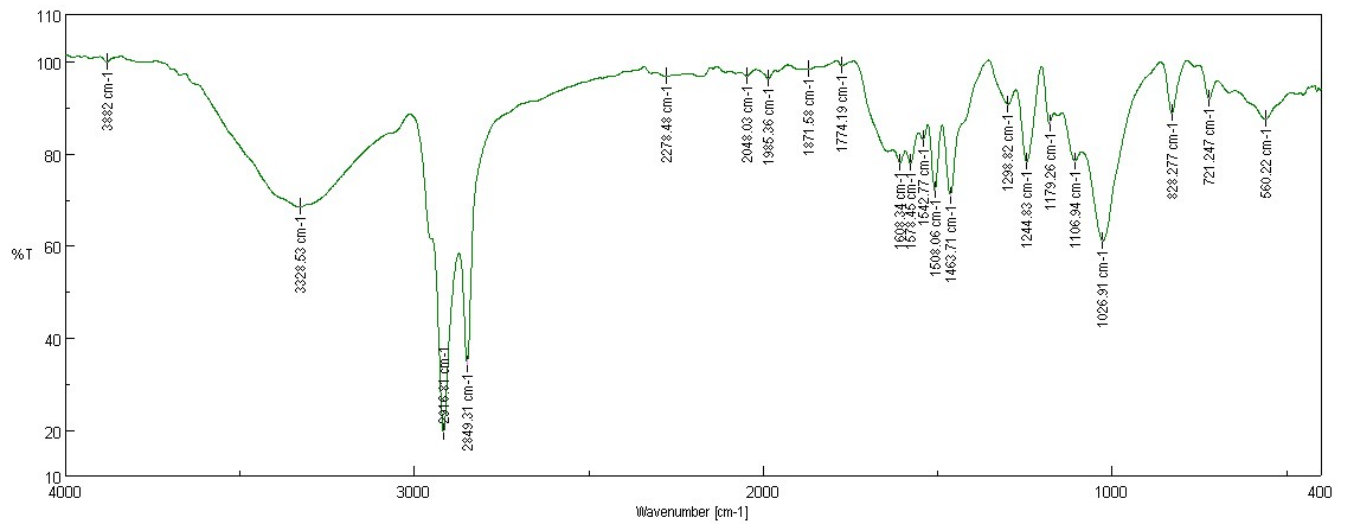

Figure S2: FTIR Analysis of Laminate 2: Kenaf + Epoxy

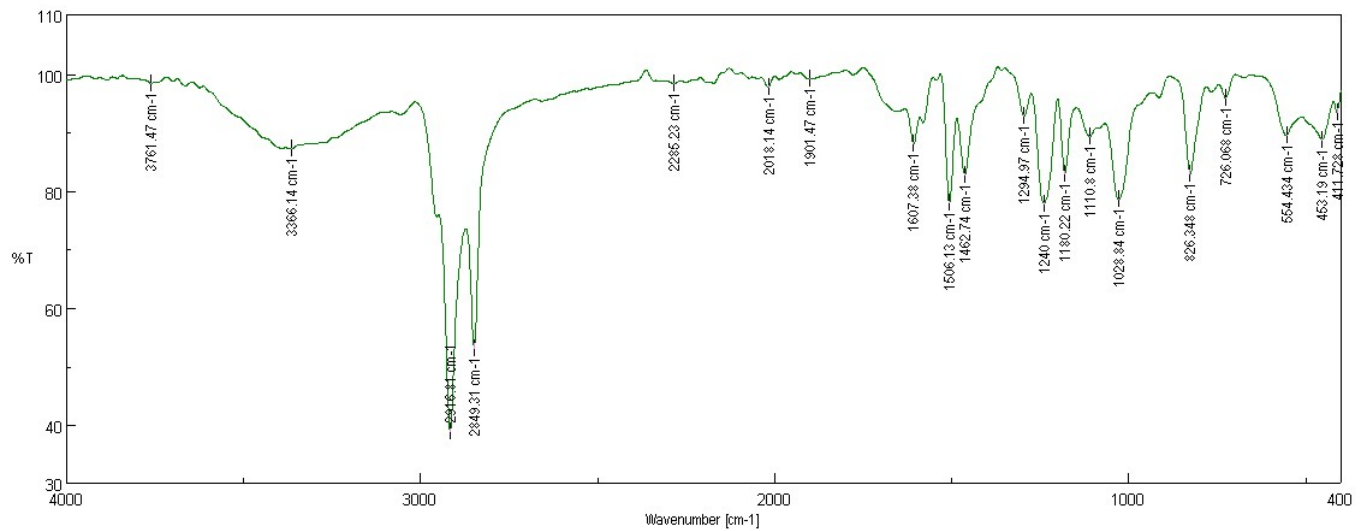

Figure S3: FTIR Analysis of Laminate 3: Bamboo + Kenaf + Epoxy

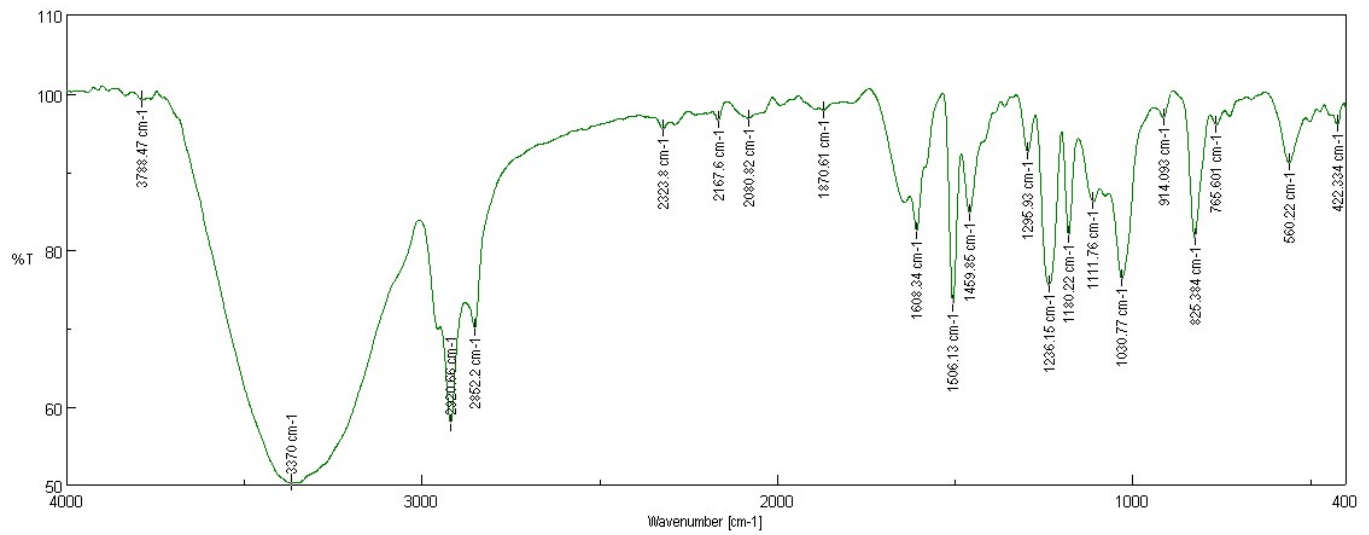

Figure S4: FTIR Analysis of Laminate 4: Bamboo + Epoxy + MWCNT

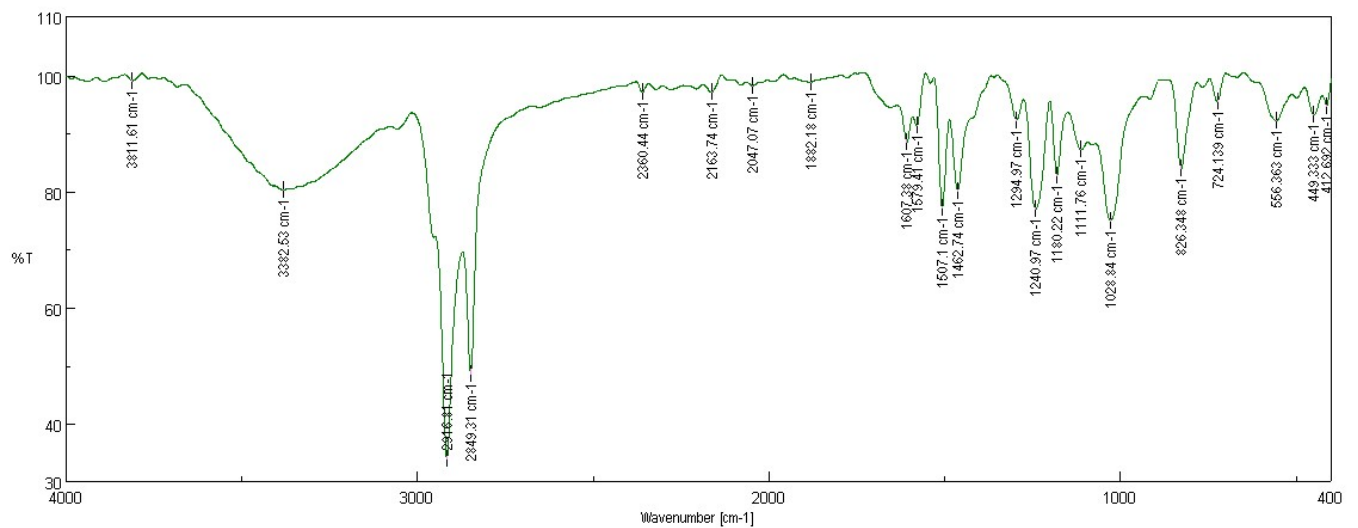

Figure S5: FTIR Analysis of Laminate 5: Kenaf + Epoxy + MWCNT

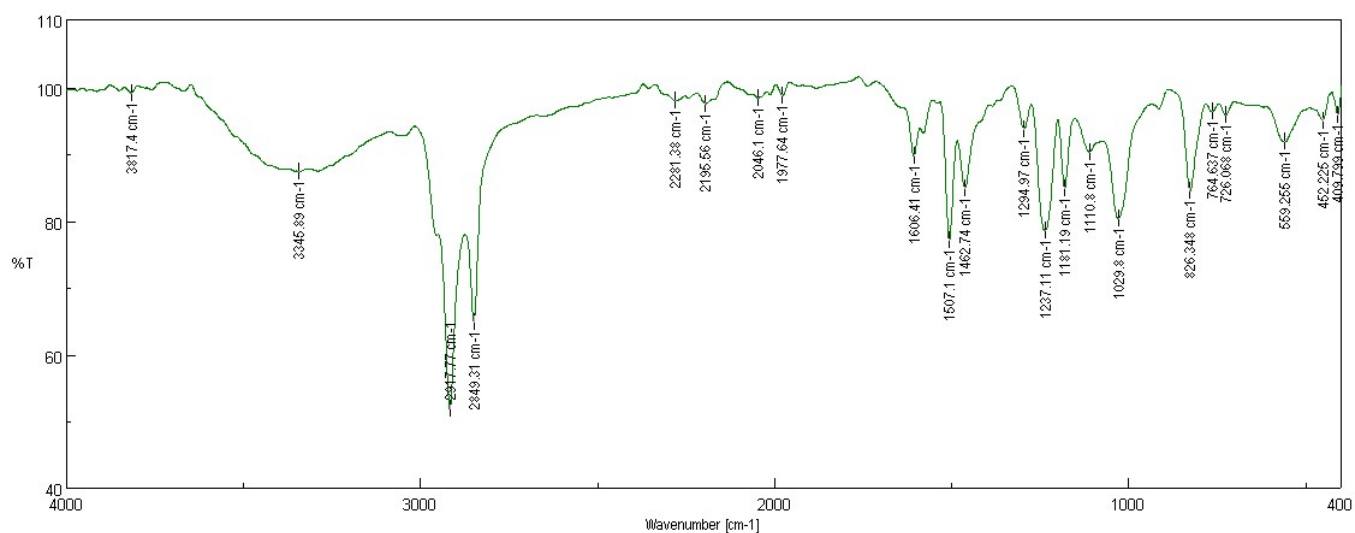

Figure S6: FTIR Analysis of Laminate 6: Bamboo + Kenaf + Epoxy + MWCNT
